# Supplementary material for: Soluble and cross-linkable polyimides from a vanillin-derived diamine: preparation, post-polymerization and properties
Source: Royal Society of Chemistry journal article supplement (doi:10.1039/d3py00755c), 2023-01-01
Supplement: d3py00755c1.pdf [file d3py00755c1.pdf]

## *Supporting Information*

# Soluble and Cross-Linkable Polyimides from a Vanillin-Derived Diamine: Preparation, Post-Polymerization and Properties

Weixian Zhang,<sup>a</sup> Qihua Wu,<sup>a</sup> Wen Shao,<sup>b</sup> Fangyu Li,<sup>a</sup> Hongzhu Chen,<sup>a</sup> Yong Pei,<sup>b</sup> Jiajia Wang<sup>\*, a, c</sup>

<sup>a</sup> Key Laboratory of Polymeric Materials & Application Technology of Hunan Province, Key Laboratory of Advanced Functional Polymeric Materials of College of Hunan Province, College of Chemistry, Xiangtan University, Xiangtan 411105, Hunan Province, P. R. China

<sup>b</sup> Key Lab of Environment-Friendly Chemistry and Application in Ministry of Education, College of Chemistry, Xiangtan University, Xiangtan 411105, Hunan Province, P. R. China

<sup>c</sup> Miluo High-tech Industrial Development Zone, Miluo 414413, Hunan Province, P. R. China

Corresponding author e-mail: [wangjiajia@xtu.edu.cn](mailto:wangjiajia@xtu.edu.cn) (Jiajia Wang)

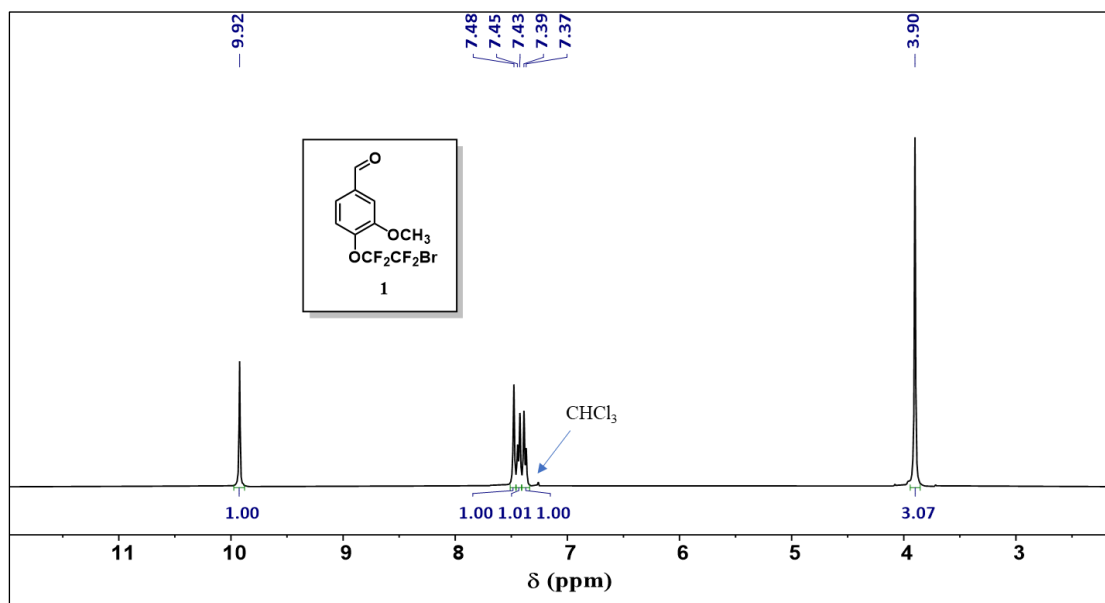

Fig. S1  $^1\text{H}$  NMR spectrum of monomer **1** ( $\text{CDCl}_3$ , 400 MHz)

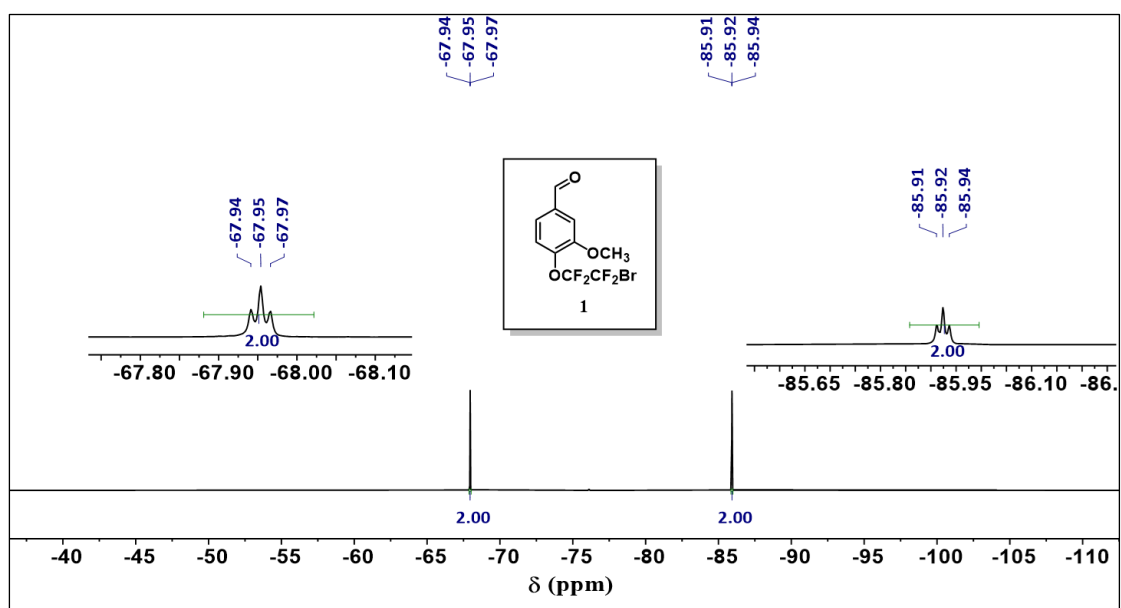

Fig. S2  $^{19}\text{F}$  NMR spectrum of monomer **1** ( $\text{CDCl}_3$ , 376 MHz)

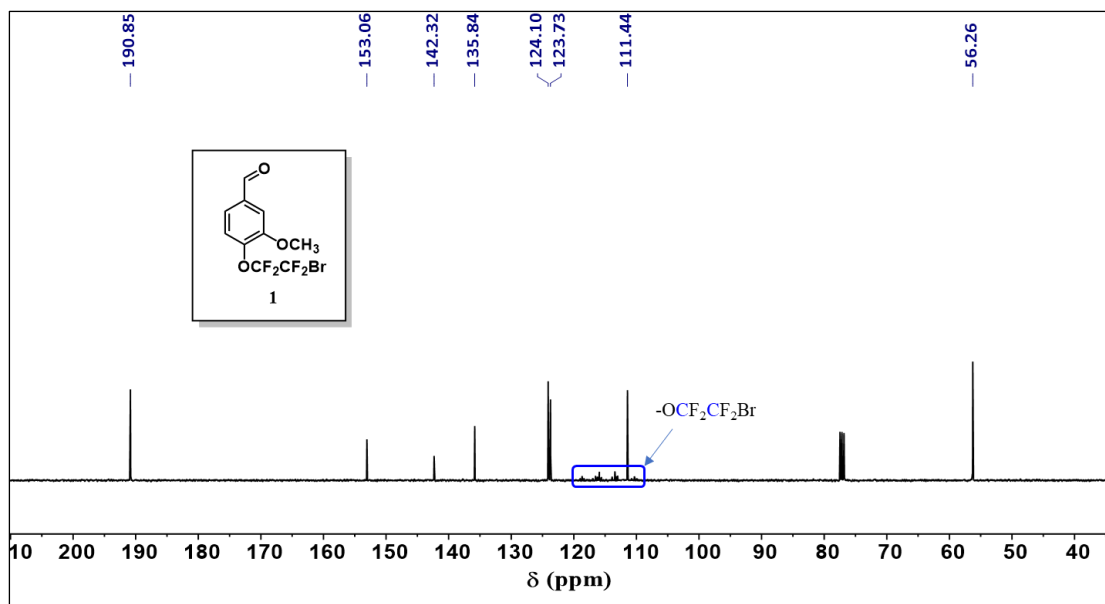

Fig. S3  $^{13}\text{C}$  NMR spectrum of monomer 1 ( $\text{CDCl}_3$ , 101 MHz)

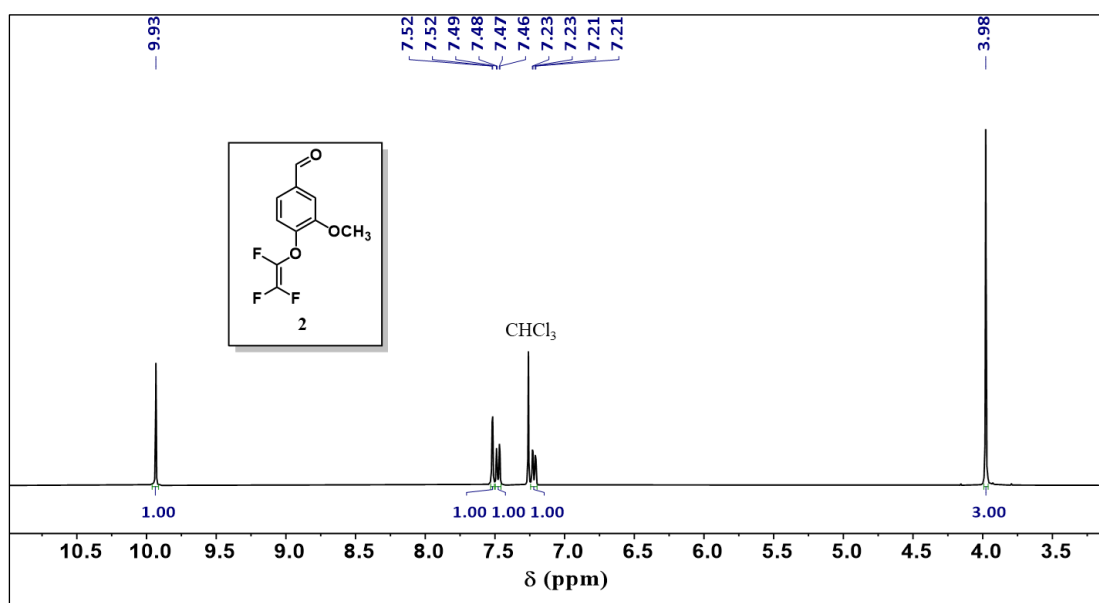

Fig. S4  $^1\text{H}$  NMR spectrum of monomer 2 ( $\text{CDCl}_3$ , 400 MHz)

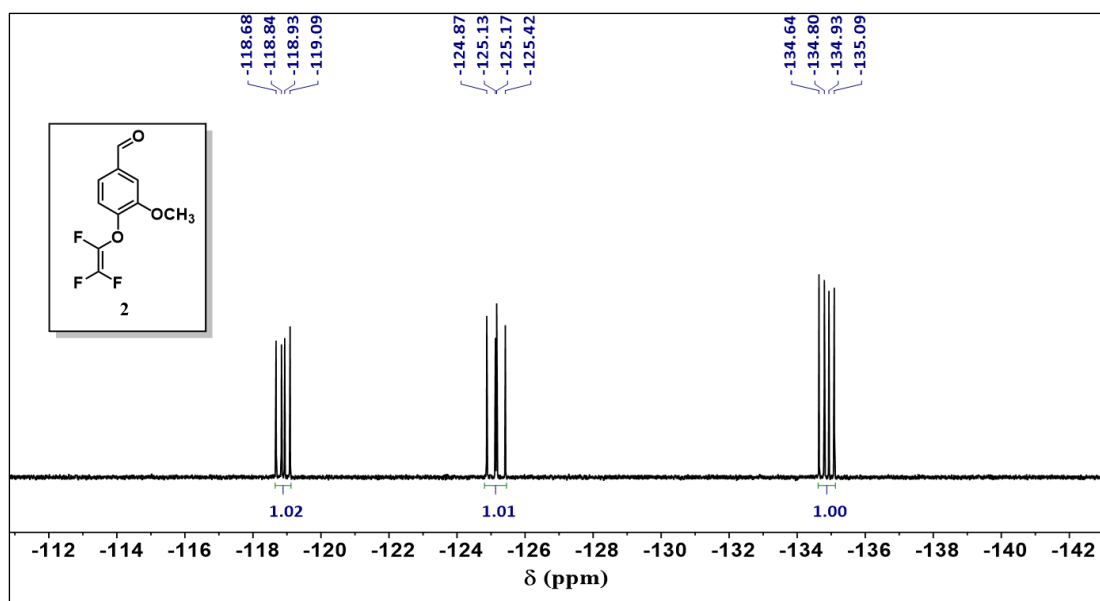

Fig. S5  $^{19}\text{F}$  NMR spectrum of monomer 2 ( $\text{CDCl}_3$ , 376 MHz)

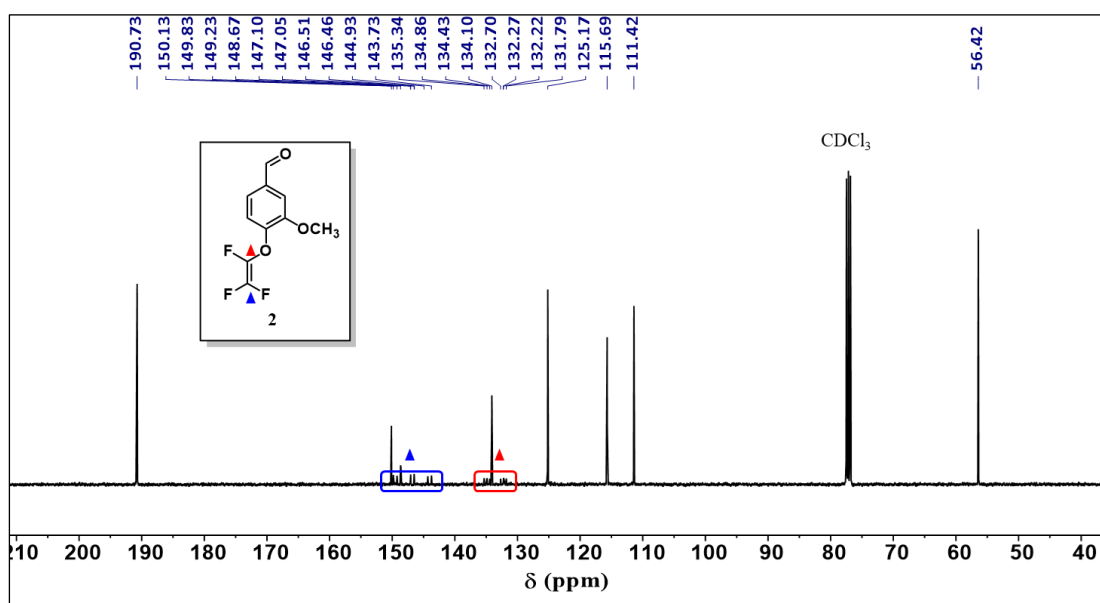

Fig. S6  $^{13}\text{C}$  NMR spectrum of monomer 2 ( $\text{CDCl}_3$ , 101 MHz)

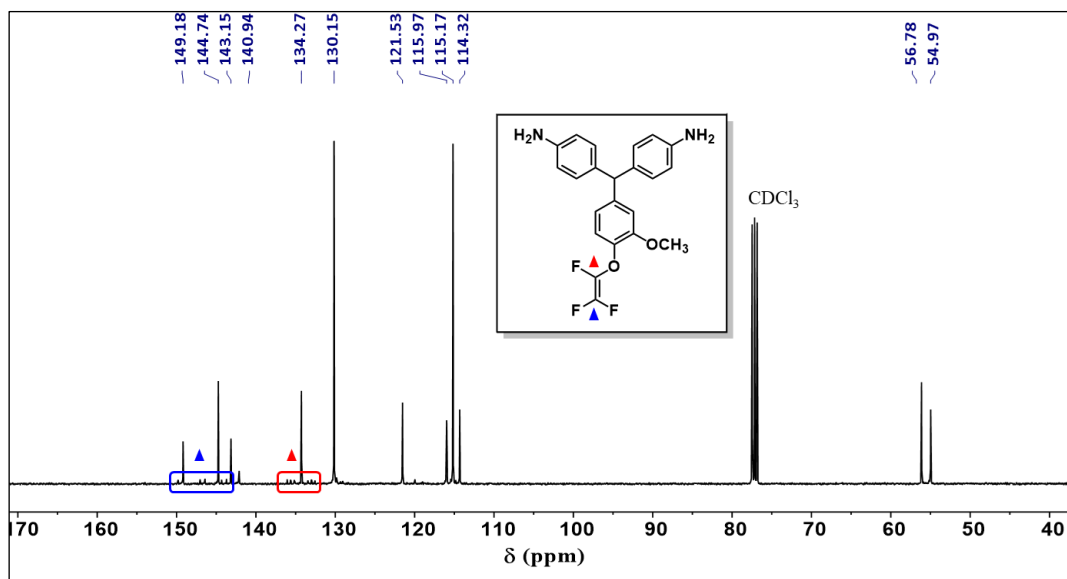

Fig. S7  $^{13}\text{C}$  NMR spectrum of DA-TFVE ( $\text{CDCl}_3$ , 101 MHz)

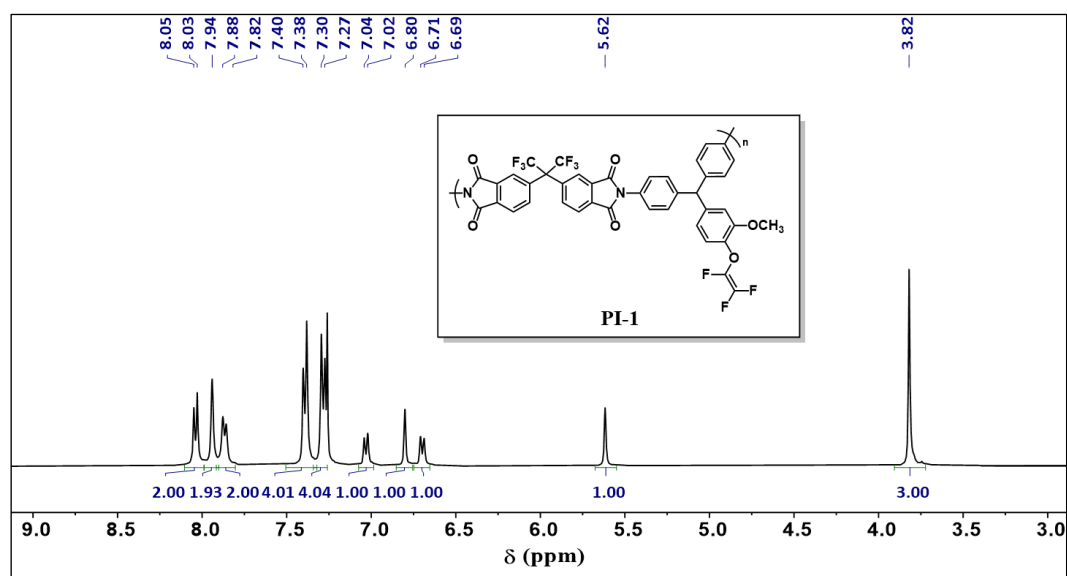

Fig. S8  $^1\text{H}$  NMR spectrum of PI-1 ( $\text{CDCl}_3$ , 400 MHz)

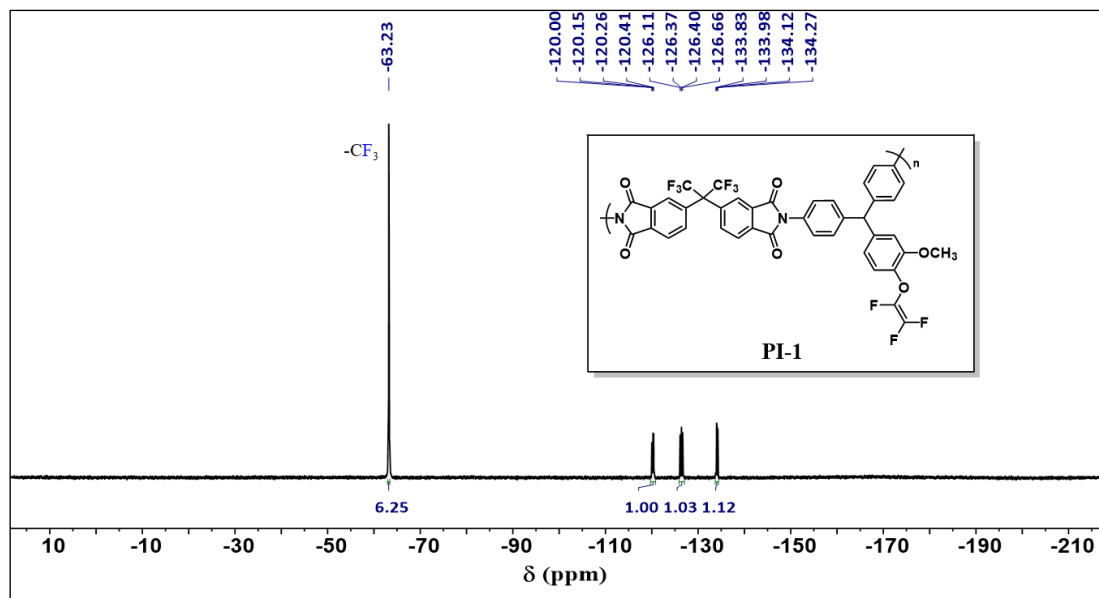

Fig. S9 <sup>19</sup>F NMR spectrum of PI-1 (CDCl<sub>3</sub>, 376 MHz)

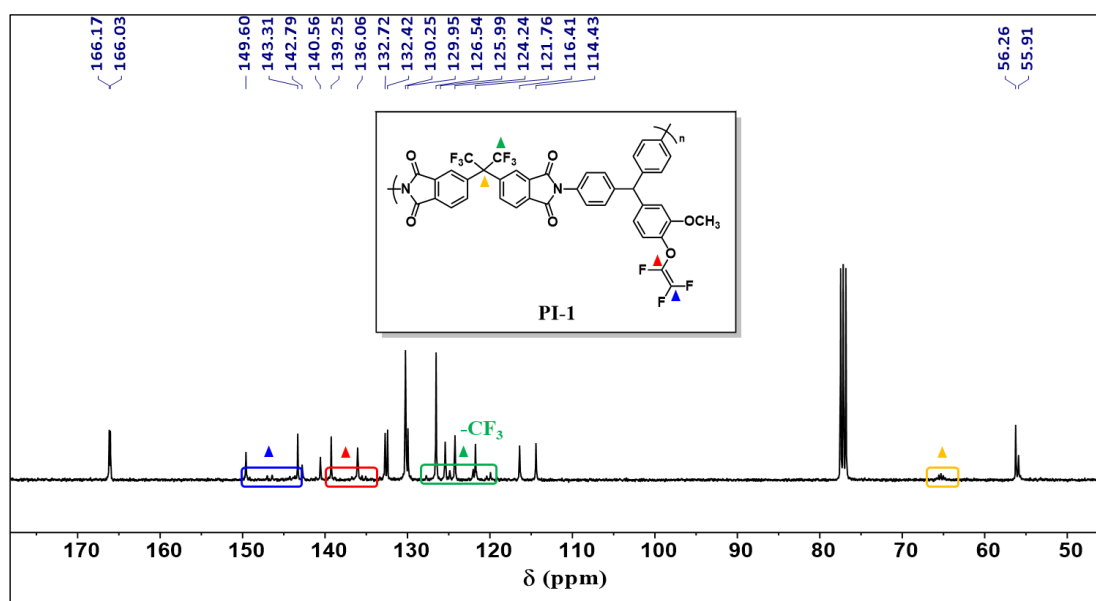

Fig. S10 <sup>13</sup>C NMR spectrum of PI-1 (CDCl<sub>3</sub>, 101 MHz)

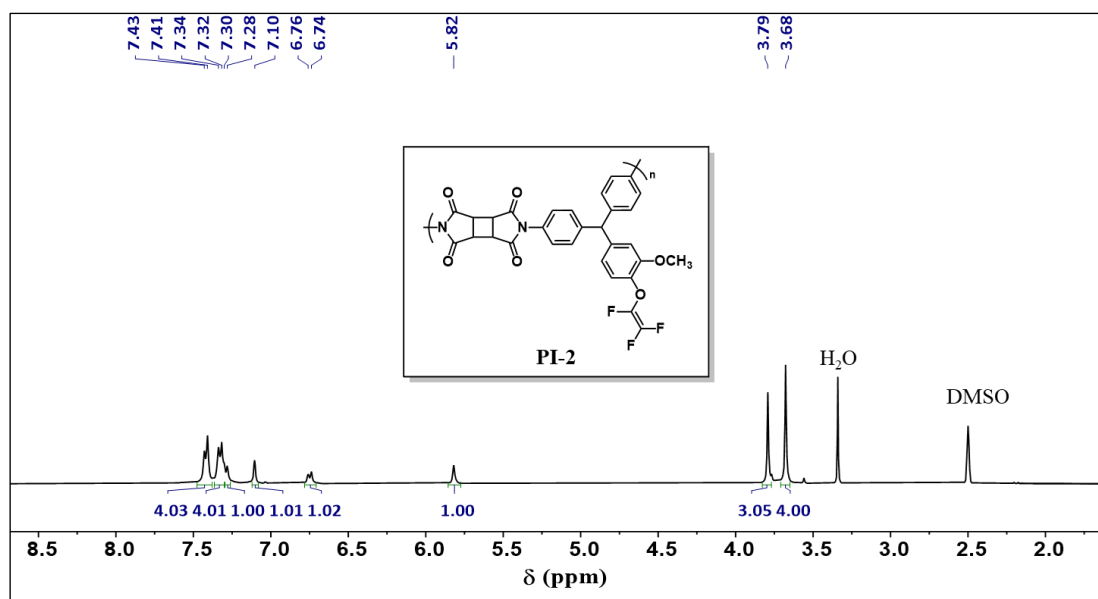

Fig. S11 <sup>1</sup>H NMR spectrum of PI-2 (DMSO-*d*<sub>6</sub>, 400 MHz)

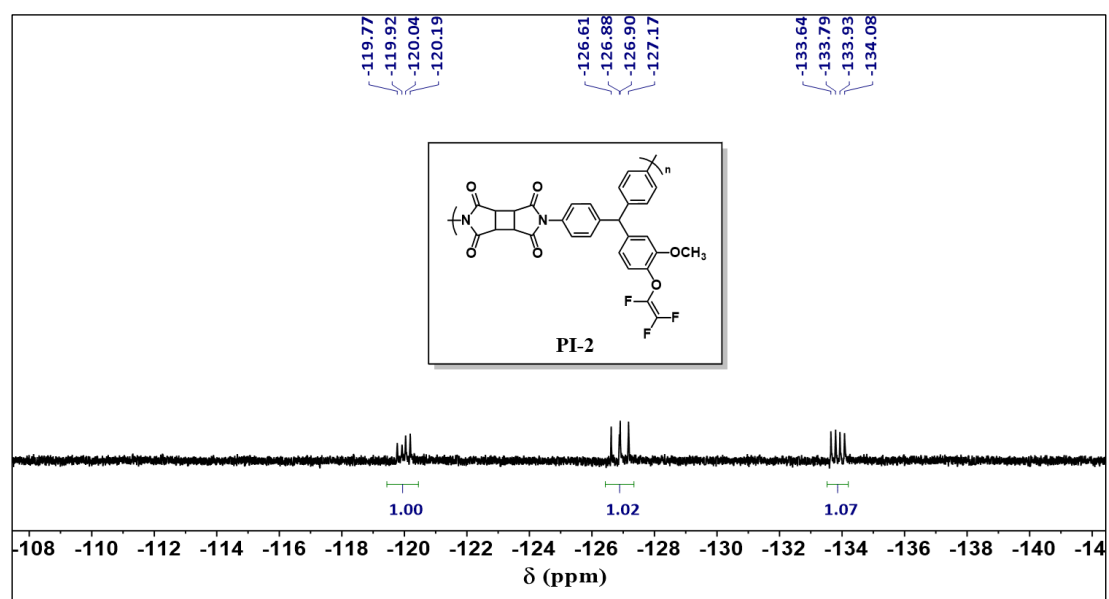

Fig. S12 <sup>19</sup>F NMR spectrum of PI-2 (DMSO-*d*<sub>6</sub>, 376 MHz)

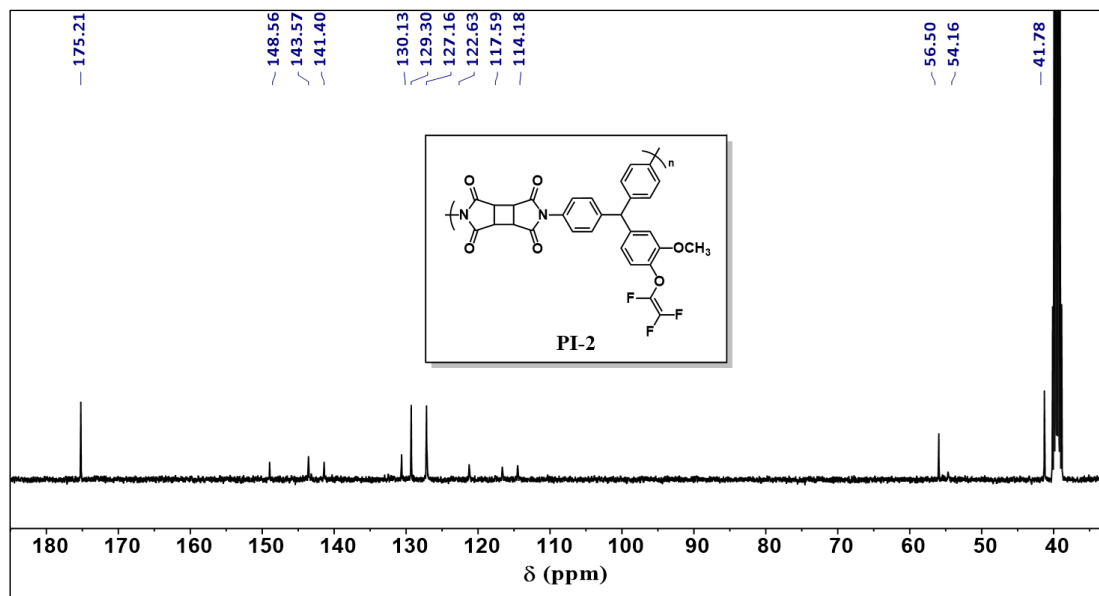

Fig. S13  $^{13}\text{C}$  NMR spectrum of PI-2 (DMSO- $d_6$ , 101 MHz)

| m/z      | Theo. Mass | Delta (ppm) | RDB equiv. | Composition                                             |
|----------|------------|-------------|------------|---------------------------------------------------------|
| 232.0343 | 232.0342   | 0.37        | -4.0       | $\text{C}_4\text{H}_{15}\text{O}_4\text{ClF}_2\text{S}$ |
|          | 232.0342   | 0.52        | 6.0        | $\text{C}_{10}\text{H}_7\text{O}_3\text{F}_3$           |
|          | 232.0341   | 0.76        | 13.0       | $\text{C}_{16}\text{H}_8\text{S}$                       |
|          | 232.0340   | 1.45        | 2.0        | $\text{C}_8\text{H}_9\text{F}_5\text{S}$                |
|          | 232.0347   | -1.58       | 1.5        | $\text{C}_7\text{H}_{10}\text{O}_2\text{NClF}_3$        |

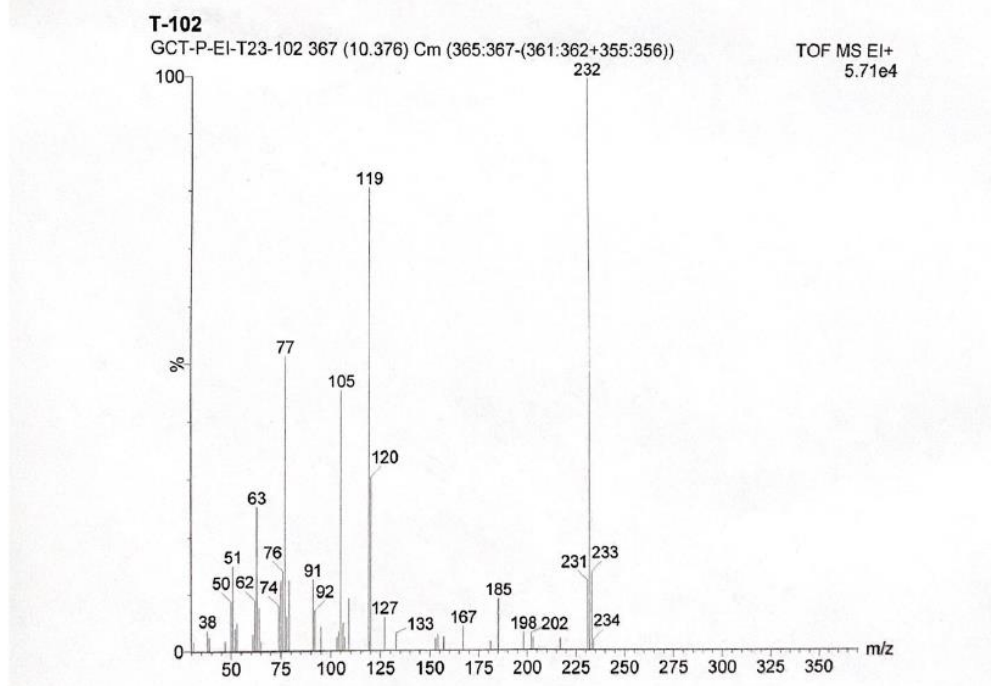

Fig. S14 Mass result of monomer 2



| m/z      | Theo. Mass | Delta (ppm) | RDB equiv. | Composition                                                                      |
|----------|------------|-------------|------------|----------------------------------------------------------------------------------|
| 400.1389 | 400.1389   | 0.10        | 7.5        | C <sub>19</sub> H <sub>24</sub> O <sub>4</sub> NF <sub>2</sub> S                 |
| 400.1389 | 400.1389   | 0.10        | 16.0       | C <sub>27</sub> H <sub>22</sub> ClF                                              |
| 400.1387 | 400.1387   | 0.50        | 5.0        | C <sub>19</sub> H <sub>23</sub> ClF <sub>6</sub>                                 |
| 400.1393 | 400.1393   | -1.03       | 13.0       | C <sub>22</sub> H <sub>19</sub> O <sub>2</sub> N <sub>2</sub> F <sub>3</sub>     |
| 400.1393 | 400.1393   | -1.12       | 3.0        | C <sub>16</sub> H <sub>27</sub> O <sub>3</sub> N <sub>2</sub> ClF <sub>2</sub> S |

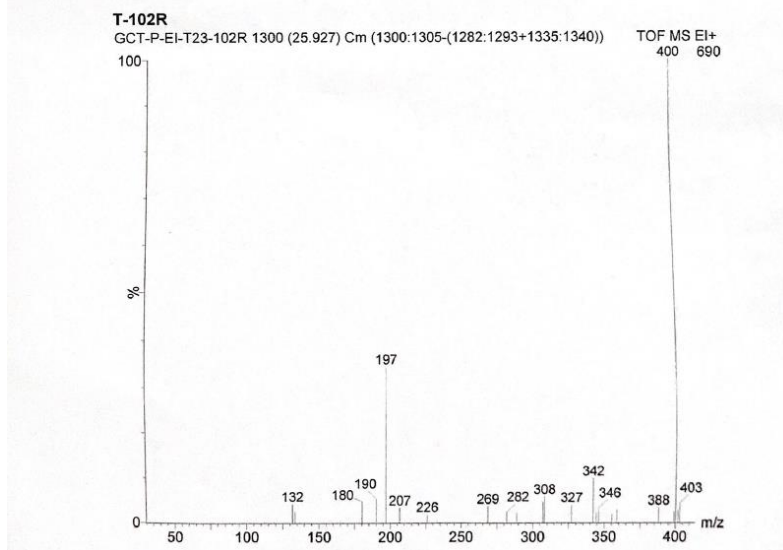

**Fig. S15** Mass result of DA-TFVE

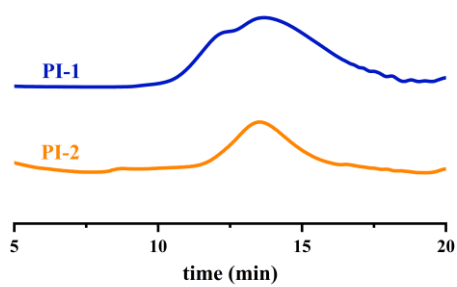

**Fig. S16** GPC curves of PI-1 and PI-2.

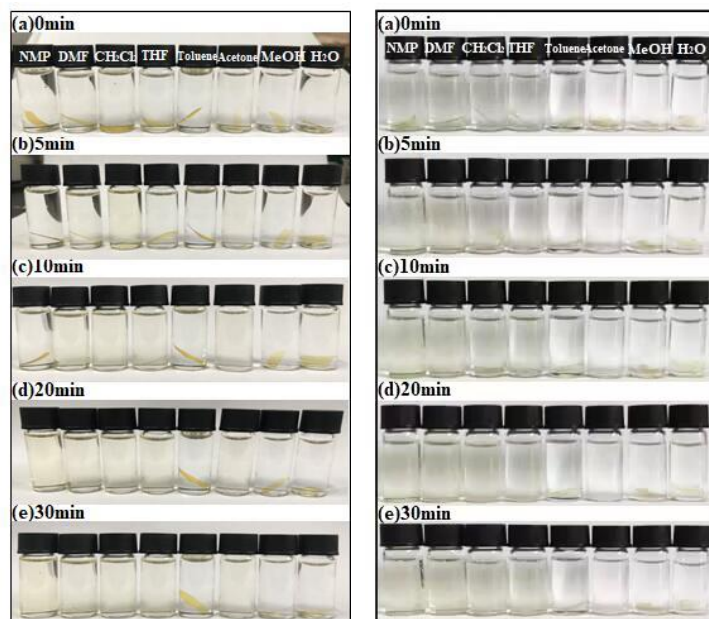

**Fig. S17** Photographs of solubility behaviors of **PI-1** (left) and **PI-2** (right) in different solvents.

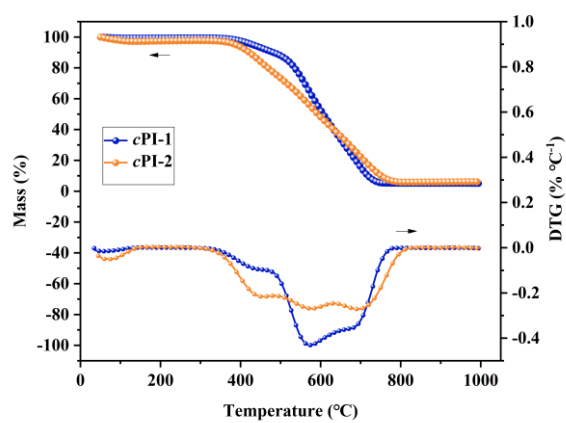

**Fig. S18** TGA curves of the crosslinked PIs in air.
